# Supplementary material for: Designing bioinspired green nanosilicas using statistical and machine learning approaches
Source: Royal Society of Chemistry journal article supplement (doi:10.1039/d0me00167h), 2021-01-01
Supplement: d0me00167h1.pdf [file d0me00167h1.pdf]

Supplementary Information

# Designing bioinspired green nanosilicas using statistical and machine learning approaches

*Luc Dewulf, Mauro Chiacchia,<sup>#</sup> Aaron S Yeardley, Robert A Milton, Solomon F. Brown and Siddharth V. Patwardhan\**

Department of Chemical and Biological Engineering,  
University of Sheffield, Mappin Street, Sheffield S1 3JD, U.K.

<sup>#</sup> Present address: Nexeon Limited, 136 Eastern Avenue, Milton Park, Abingdon,  
Oxon, OX14 4SB UK

[\\*s.patwardhan@sheffield.ac.uk](mailto:s.patwardhan@sheffield.ac.uk)

**Table S1.** Design and results for the pre-screening experiments.

| Samples    | Si:N <i>mol/mol</i> |         | [Si] <i>mM</i> |        | Yield <i>mol%</i> | Surface area <i>m<sup>2</sup>/g</i> |
|------------|---------------------|---------|----------------|--------|-------------------|-------------------------------------|
|            | Design              | Actual  | Design         | Actual |                   |                                     |
| <b>PEI</b> |                     |         |                |        |                   |                                     |
| 1          | 0.0884              | 0.0822  | 30             | 27.89  | 0                 | n/a*                                |
| 2          | 0.0884              | 0.0876  | 30             | 29.73  | 0                 | n/a                                 |
| 3          | 11.3137             | 11.3706 | 30             | 30.15  | 38                | 135                                 |
| 4          | 11.3137             | 11.4725 | 30             | 30.42  | 6                 | 222                                 |
| 5          | 0.0884              | 0.0637  | 165            | 118.94 | 0                 | n/a                                 |
| 6          | 0.0884              | 0.0631  | 165            | 117.86 | 0                 | n/a                                 |
| 7          | 11.3137             | 12.0005 | 165            | 175.02 | 46                | 268                                 |
| 8          | 11.3137             | 11.7695 | 165            | 171.65 | 68                | 313                                 |
| 9          | 0.0625              | 0.0455  | 97.5           | 70.91  | 0                 | n/a                                 |
| 10         | 0.0625              | 0.0452  | 97.5           | 70.58  | 0                 | n/a                                 |
| 11         | 16                  | 16.3344 | 97.5           | 99.54  | 22                | 235                                 |
| 12         | 16                  | 16.4055 | 97.5           | 99.97  | 7                 | 443                                 |
| 13         | 1                   | 0.9941  | 2.04           | 2.03   | 0                 | n/a                                 |
| 14         | 1                   | 1.1191  | 2.04           | 2.28   | 0                 | n/a                                 |
| 15         | 1                   | 1.0202  | 193            | 196.9  | 95                | 120                                 |
| 16         | 1                   | 0.9662  | 193            | 186.47 | 128**             | 162                                 |
| 17         | 1                   | 0.9902  | 97.5           | 96.54  | 100               | 214                                 |
| 18         | 1                   | 1       | 97.5           | 97.5   | 96                | 94                                  |
| 19         | 1                   | 1       | 97.5           | 97.5   | 92                | 107                                 |
| 20         | 1                   | 1.0203  | 97.5           | 99.48  | 93                | 73                                  |
| 21         | 1                   | 1.0192  | 97.5           | 99.37  | 93                | 197                                 |
| 22         | 1                   | 0.9961  | 97.5           | 97.12  | 89                | 264                                 |
| 23         | 1                   | 1.0146  | 97.5           | 98.93  | 88                | 178                                 |
| 24         | 1                   | 1.0025  | 97.5           | 97.74  | 92                | 181                                 |
| 25         | 1                   | 1.0044  | 97.5           | 97.93  | 88                | 214                                 |
| 26         | 1                   | 1.005   | 97.5           | 97.99  | 100               | 133                                 |
| 27         | 1                   | 1.0172  | 97.5           | 99.17  | 96                | 122                                 |
| 28         | 1                   | 1.017   | 97.5           | 99.16  | 94                | 121                                 |

Continued to next page ....

....continued Table S1

| Samples     | Si:N mol/mol |         | [Si] mM |        | Yield mol% | Surface area<br>m <sup>2</sup> /g |
|-------------|--------------|---------|---------|--------|------------|-----------------------------------|
|             | Design       | Actual  | Design  | Actual |            |                                   |
| <b>TEPA</b> |              |         |         |        |            |                                   |
| 29          | 0.0884       | 0.0768  | 30      | 26.06  | 62         | 45                                |
| 30          | 0.0884       | 0.0761  | 30      | 25.83  | 72         | 35                                |
| 31          | 11.3137      | 11.428  | 30      | 30.3   | 87         | 256                               |
| 32          | 11.3137      | 11.6075 | 30      | 30.78  | 1          | 165                               |
| 33          | 0.0884       | 0.0544  | 165     | 101.56 | 79         | 70                                |
| 34          | 0.0884       | 0.0556  | 165     | 103.71 | 86         | 82                                |
| 35          | 11.3137      | 11.3137 | 165     | 165    | 10         | 256                               |
| 36          | 11.3137      | 12.3184 | 165     | 179.65 | 77         | 256                               |
| 37          | 0.0625       | 0.0347  | 97.5    | 54.17  | 78         | 40                                |
| 38          | 0.0625       | 0.0356  | 97.5    | 55.59  | 55         | 55                                |
| 39          | 16           | 16.8422 | 97.5    | 102.63 | 0          | n/a                               |
| 40          | 16           | 16.7363 | 97.5    | 101.99 | 0          | n/a                               |
| 41          | 1            | 0.9804  | 2.04    | 2      | 0          | n/a                               |
| 42          | 1            | 0.9804  | 2.04    | 2      | 0          | n/a                               |
| 43          | 1            | 1       | 193     | 193    | 84         | 53                                |
| 44          | 1            | 1       | 193     | 193    | 90         | 56                                |
| 45          | 1            | 1       | 97.5    | 97.5   | 84         | 34                                |
| 46          | 1            | 1       | 97.5    | 97.5   | 62         | 37                                |
| 47          | 1            | 1       | 97.5    | 97.5   | 82         | 33                                |
| 48          | 1            | 1.0217  | 97.5    | 99.61  | 80         | 34                                |
| 49          | 1            | 1.0242  | 97.5    | 99.86  | 76         | 27                                |
| 50          | 1            | 0.9839  | 97.5    | 95.93  | 79         | 38                                |
| 51          | 1            | 1.005   | 97.5    | 97.99  | 82         | 39                                |
| 52          | 1            | 1.0363  | 97.5    | 101.04 | 83         | 32                                |
| 53          | 1            | 1.0095  | 97.5    | 98.43  | 86         | 34                                |
| 54          | 1            | 1.0461  | 97.5    | 102    | 82         | 39                                |
| 55          | 1            | 1.0328  | 97.5    | 100.7  | 84         | 37                                |
| 56          | 1            | 1.0095  | 97.5    | 98.43  | 78         | 37                                |

\* As no precipitate was obtained, the surface area was not available.

\*\* A yield of  $\geq 100\%$  suggests incomplete drying. Inferior gravimetric yield determination was only used for the pre-screening experiments. The superior silicomolybdic acid spectrophotometric method, which is independent of the moisture content of the silica product, was used throughout all further experiments (section 2.2.2).

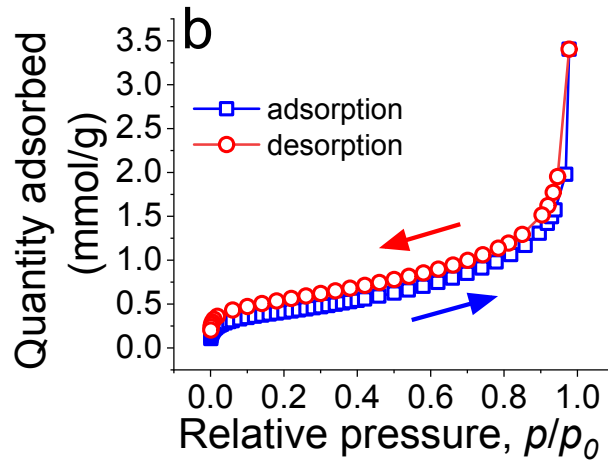

**Figure S1.** A representative N<sub>2</sub> adsorption-desorption isotherm.

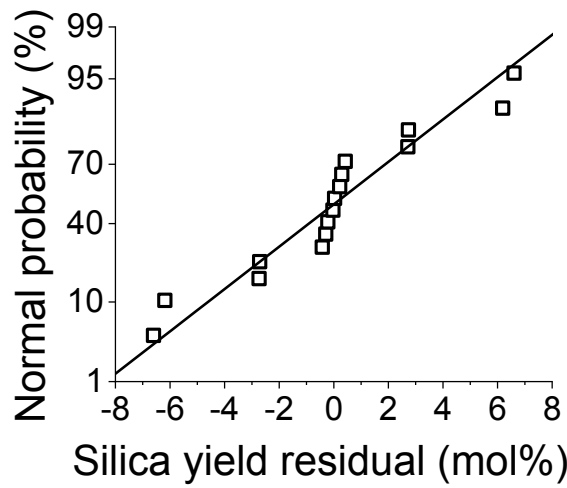

**Fig. S2.** Residual plot of the silica yield response. The close proximity of the experimental observations to the normal line shows that the data is normally distributed.

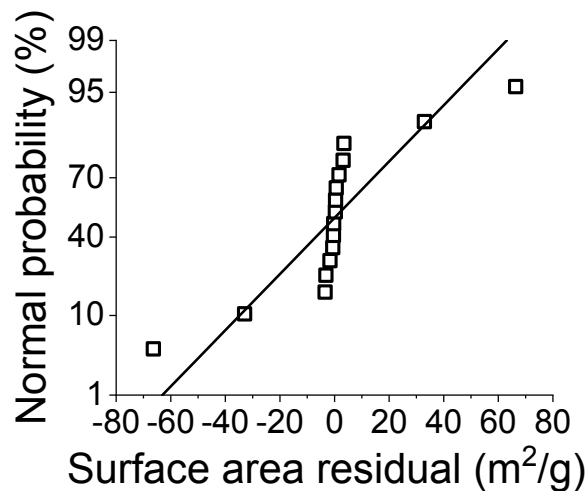

**Fig. S3.** Residual plot of the silica BET surface area response. The reasonably close proximity of the experimental observations to the normal line shows that the data is generally normally distributed.
